# Supplementary material for: Anti-apoptotic Bcl-XL but not Mcl-1 contributes to protection against virus-induced apoptosis
Source: PubMed Central journal article supplement (PMC5108327; doi:10.1038/cddis.2016.242), 2016-08-18
Supplement: cddis2016242x1.pdf [file cddis2016242x1.pdf]

## Suppl. Fig. S1

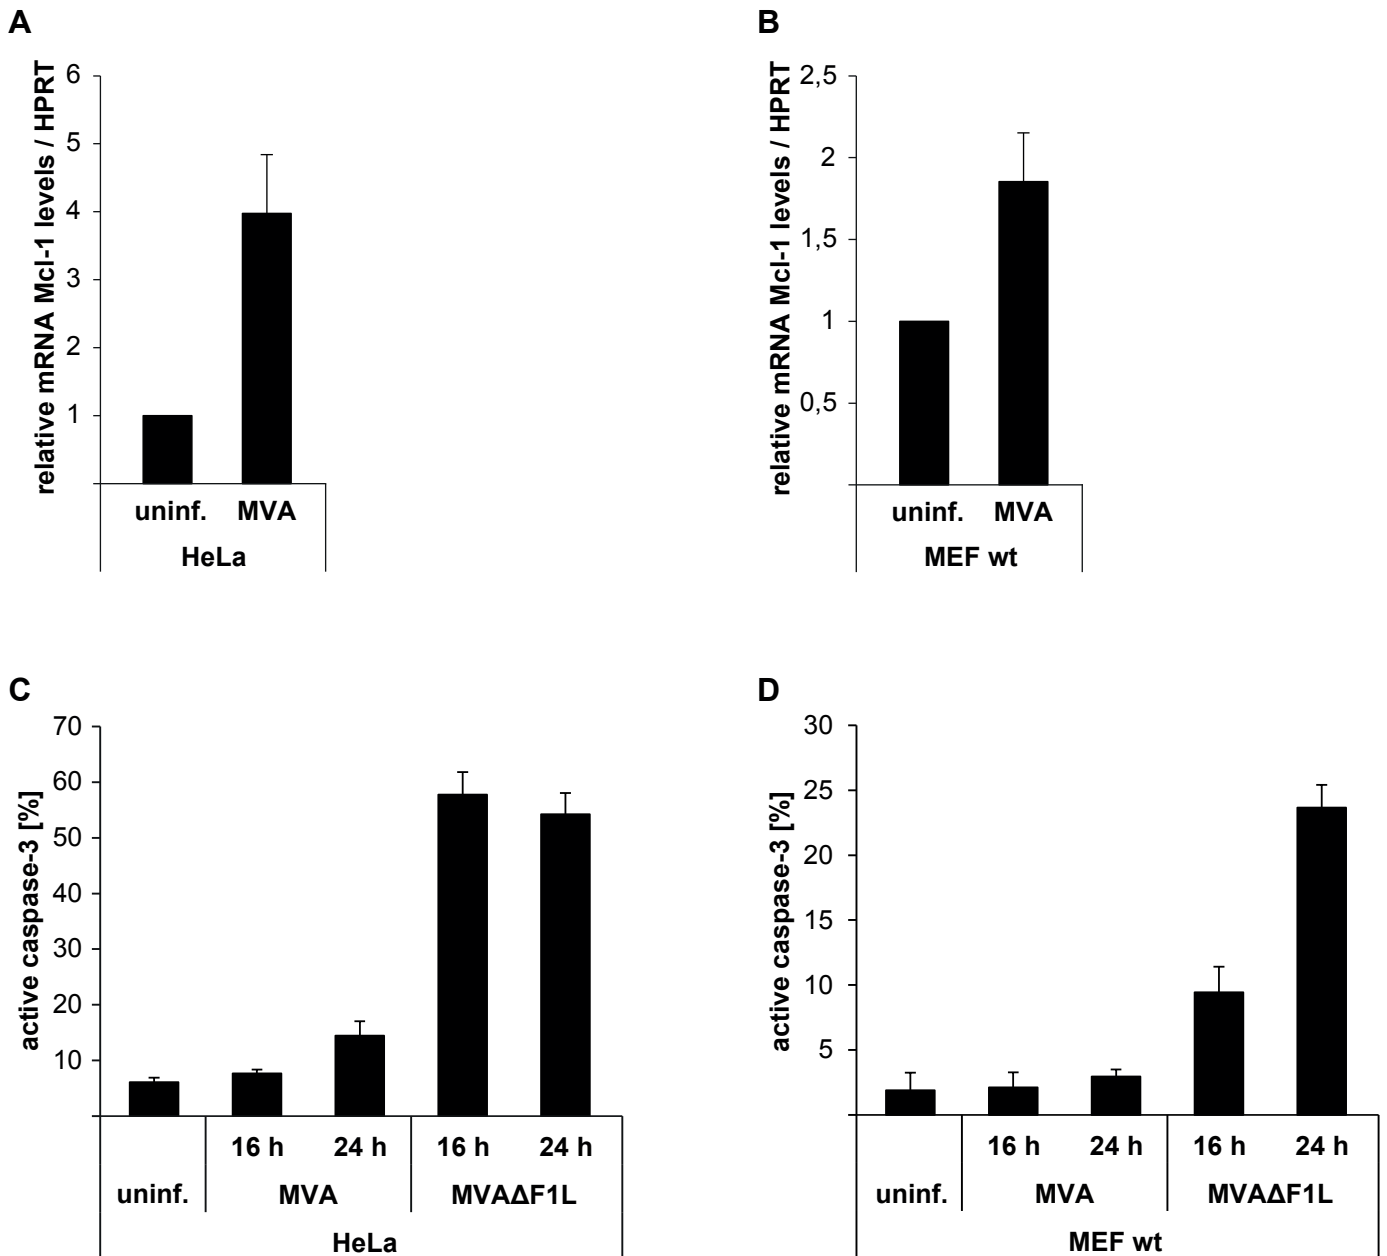

### Figure S1

(A, B) MVA infection leads to an increase in Mcl-1 mRNA levels in HeLa and MEF cells. Relative Mcl-1 mRNA levels (normalized to HPRT) were measured by qRT-PCR in HeLa (A) or MEF wt cells (B) after 24 h of infection with MVA. mRNA levels for uninfected cells are set to 1. Data show means/SEM of 3 independent experiments.

(C, D) Infection with MVAΔF1L but not MVA leads to apoptosis in HeLa and MEF cells. HeLa (C) or MEF wt cells (D) were infected with MVA or MVAΔF1L (MOI = 10) for 16 h or 24 h. Apoptosis was measured as the percentage of cells positive for active caspase-3 by flow cytometry. Data show means/SEM of 3 independent experiments.

## Suppl. Fig. S2

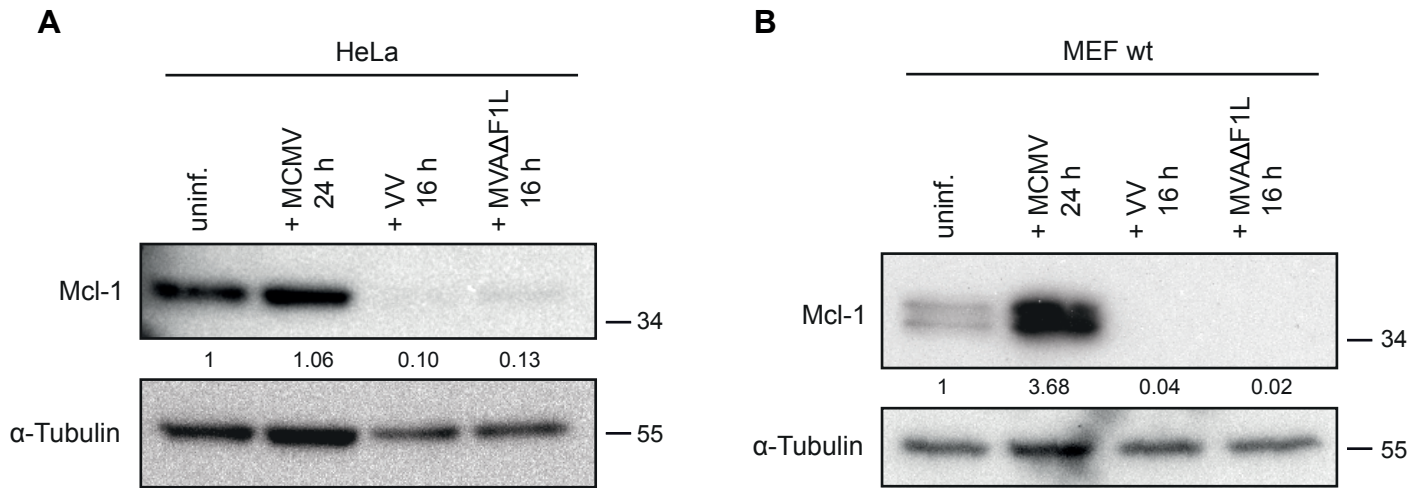

### Figure S2

VACV and MVA $\Delta$ F1L infection leads to a reduction, MCMV infection to no change or an enhanced expression of Mcl-1 in HeLa and MEF cells.

HeLa (**A**) or MEF wt cells (**B**) were infected with MCMV, VACV or MVA $\Delta$ F1L (all MOI = 10) for the times indicated. Protein levels were determined by Western blotting. Signals were quantified by densitometry and changes in Mcl-1/ $\alpha$ -Tubulin ratios normalized to uninfected control are shown below the blots. Data are representative of 3 independent experiments.

## Suppl. Fig. S3

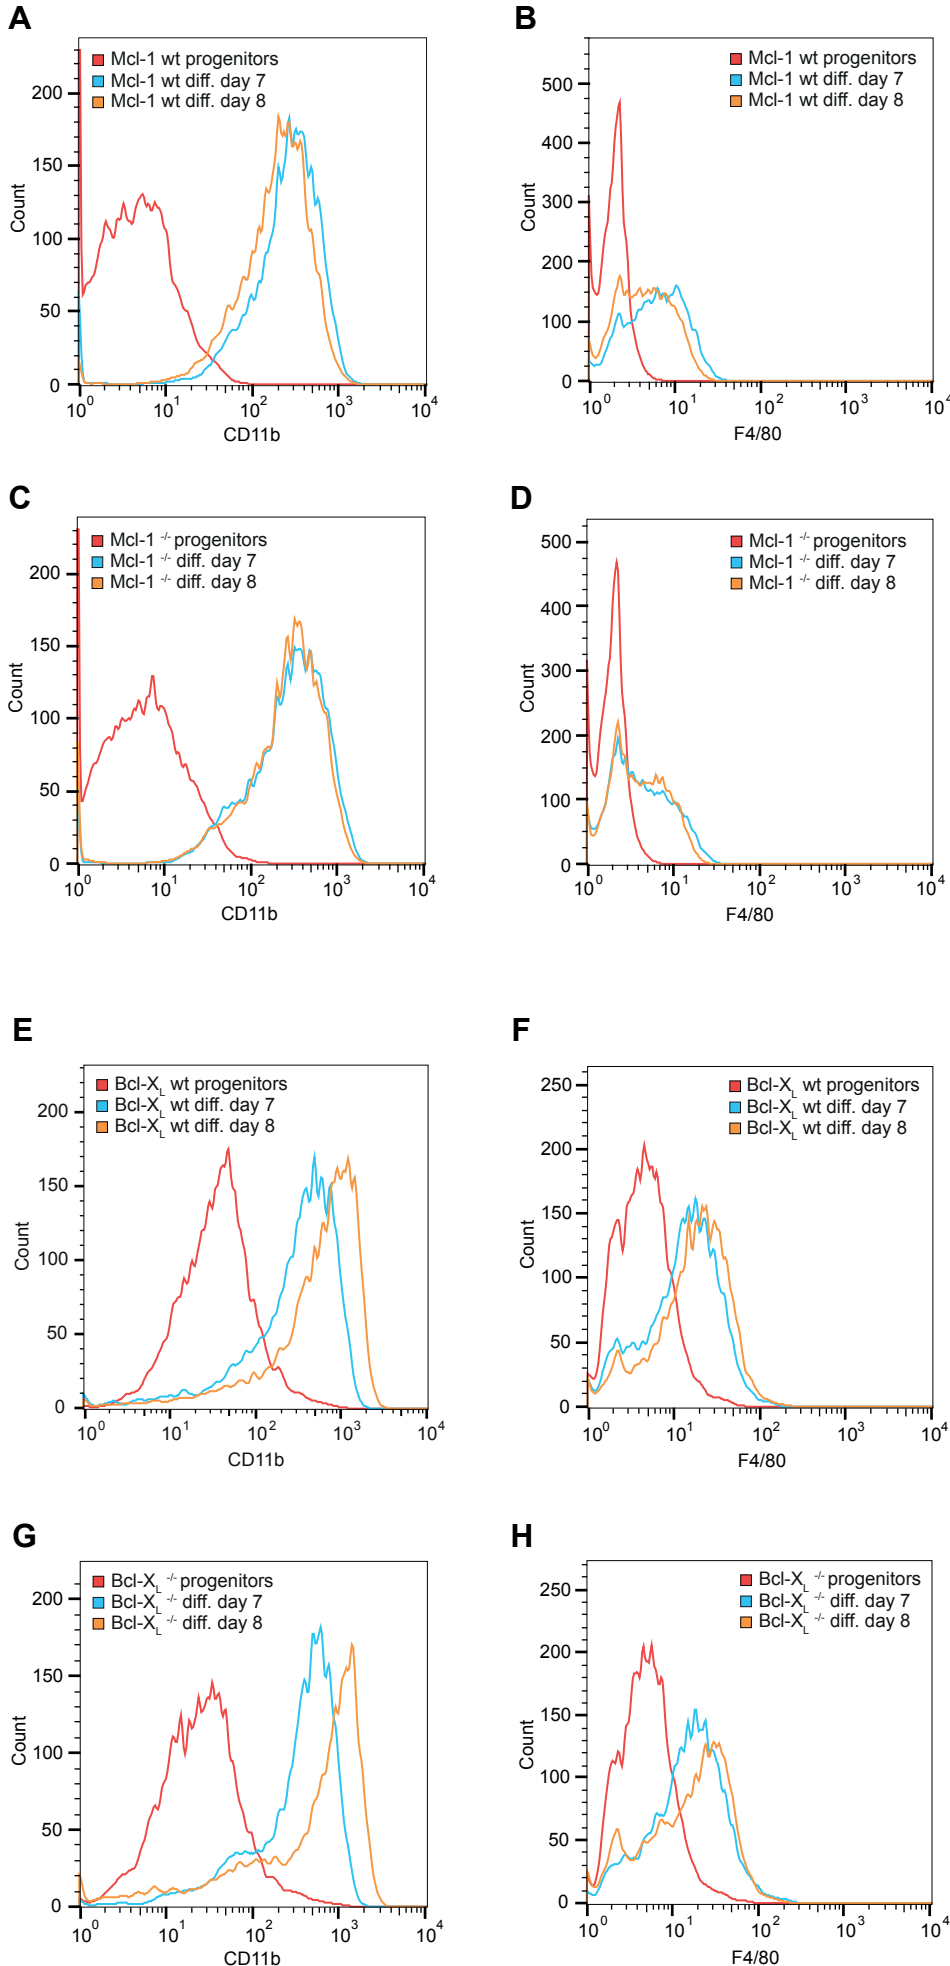

**Figure S3**

No differences in expression of the myeloid marker CD11b (A, C, E, G) and the macrophage-specific marker F4/80 (B, D, F, H) can be seen between Mcl-1<sup>-/-</sup> (A-D), Bcl-X<sub>L</sub><sup>-/-</sup> (E-H) and the respective wt cells during macrophage differentiation. Flow cytometry analysis of expression of CD11b (A, C, E, G) and F4/80 (B, D, F, H) was performed on progenitor cells and differentiated macrophages. Data are representative of at least 3 independent experiments.

## Suppl. Fig. S4

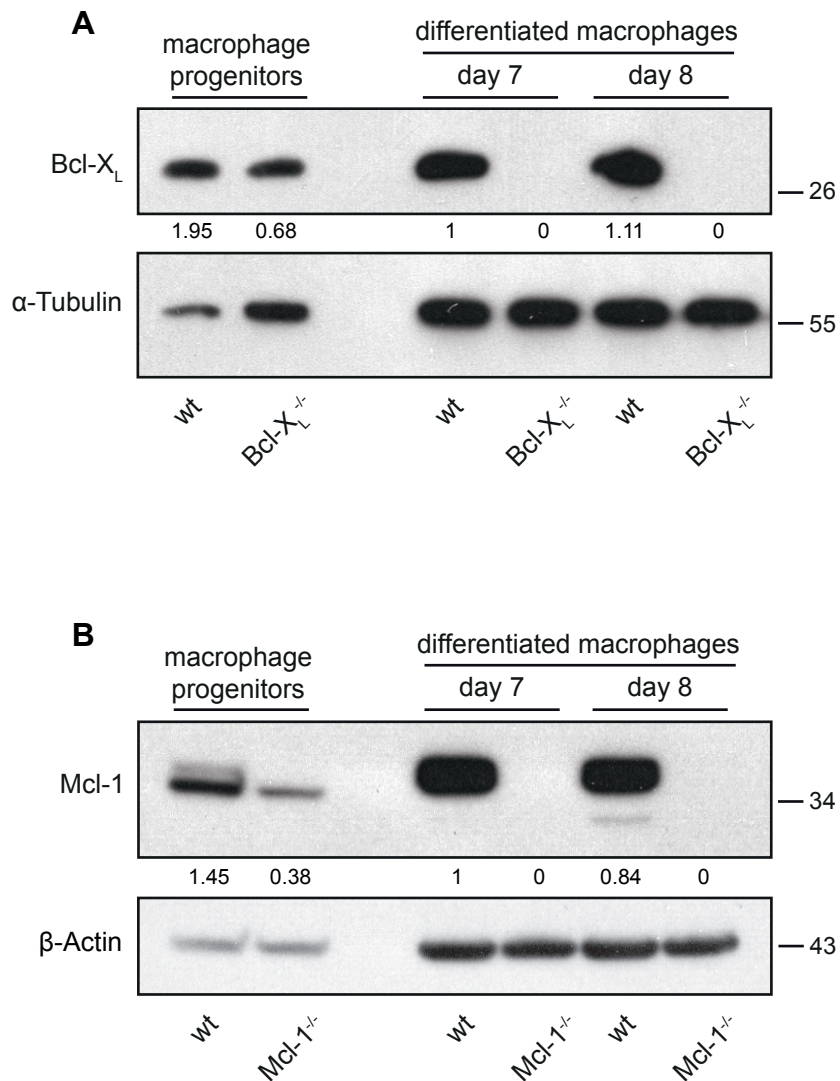

### Figure S4

Western blot showing the expression of Bcl-X<sub>L</sub> and Mcl-1 in progenitors and differentiated macrophages.

Macrophage progenitors of the genetic background LysM-Cre/Bcl-X<sub>L</sub><sup>flox/flox</sup> (**A**) or LysM-Cre/Mcl-1<sup>flox/flox</sup> (**B**) were differentiated for 7 and 8 days alongside the corresponding wt lines and protein levels were assessed by Western blotting. Signals were quantified by densitometry and changes in Bcl-X<sub>L</sub>/α-Tubulin or Mcl-1/β-Actin ratios normalized to wt control at day 7 of differentiation are shown below the blots. Data are representative of at least 4 independent experiments.

## Suppl. Fig. S5

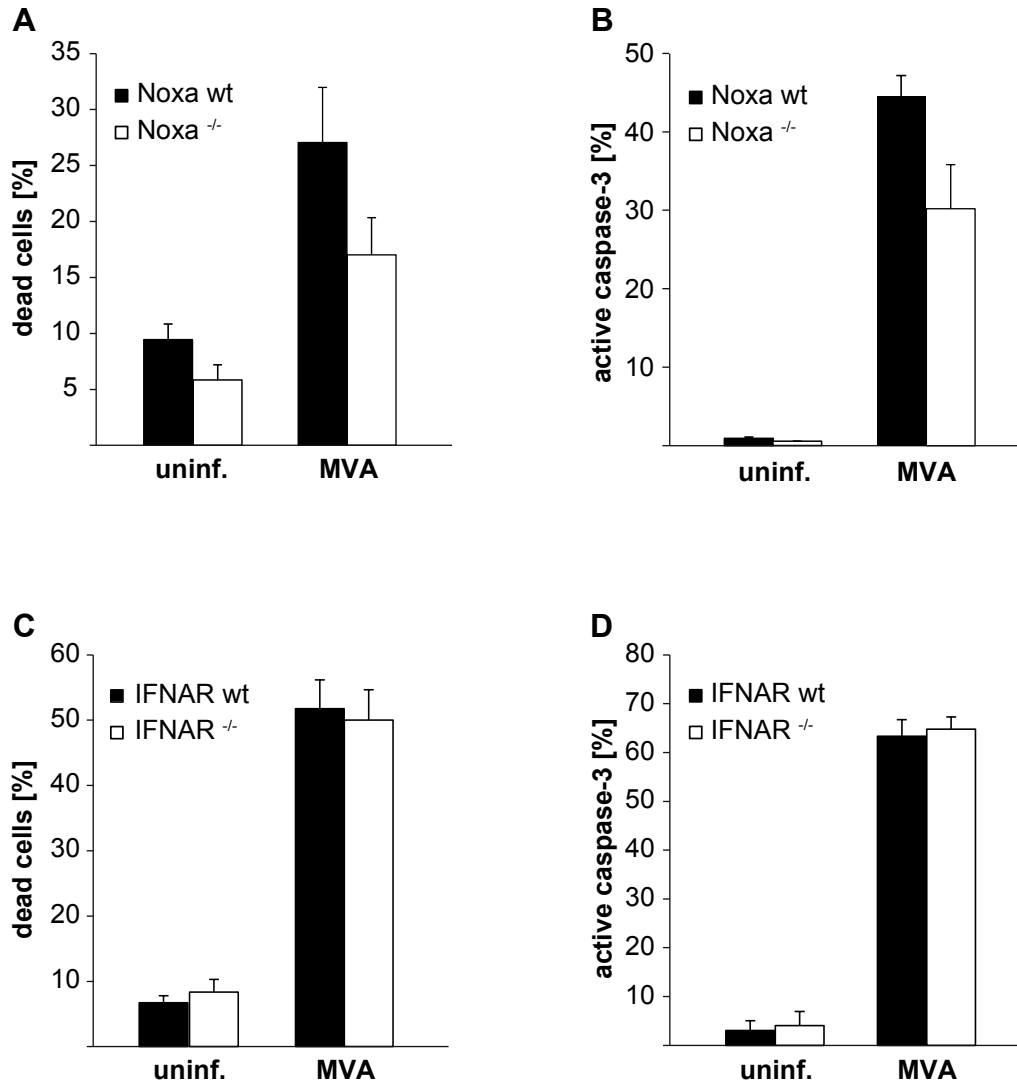

### Figure S5

Noxa deficient macrophages are partly protected against MVA-infection (**A, B**) whereas IFNAR $^{-/-}$  macrophages are not (**C, D**).

On day 7 of differentiation Noxa $^{-/-}$  (**A, B**) or IFNAR $^{-/-}$  macrophages (**C, D**), together with the corresponding wt cells were infected with MVA (MOI = 10) for 16 h. Cell death was measured as the percentage of cells positive for the Far Red dye of the Dead Cell Stain Kit (**A, C**) and apoptosis induction as the percentage of cells positive for active caspase-3 (**B, D**) by flow cytometry. Data show means/SEM of 4 (A) or 5 (B, C, D) independent experiments.

## Suppl. Fig. S6

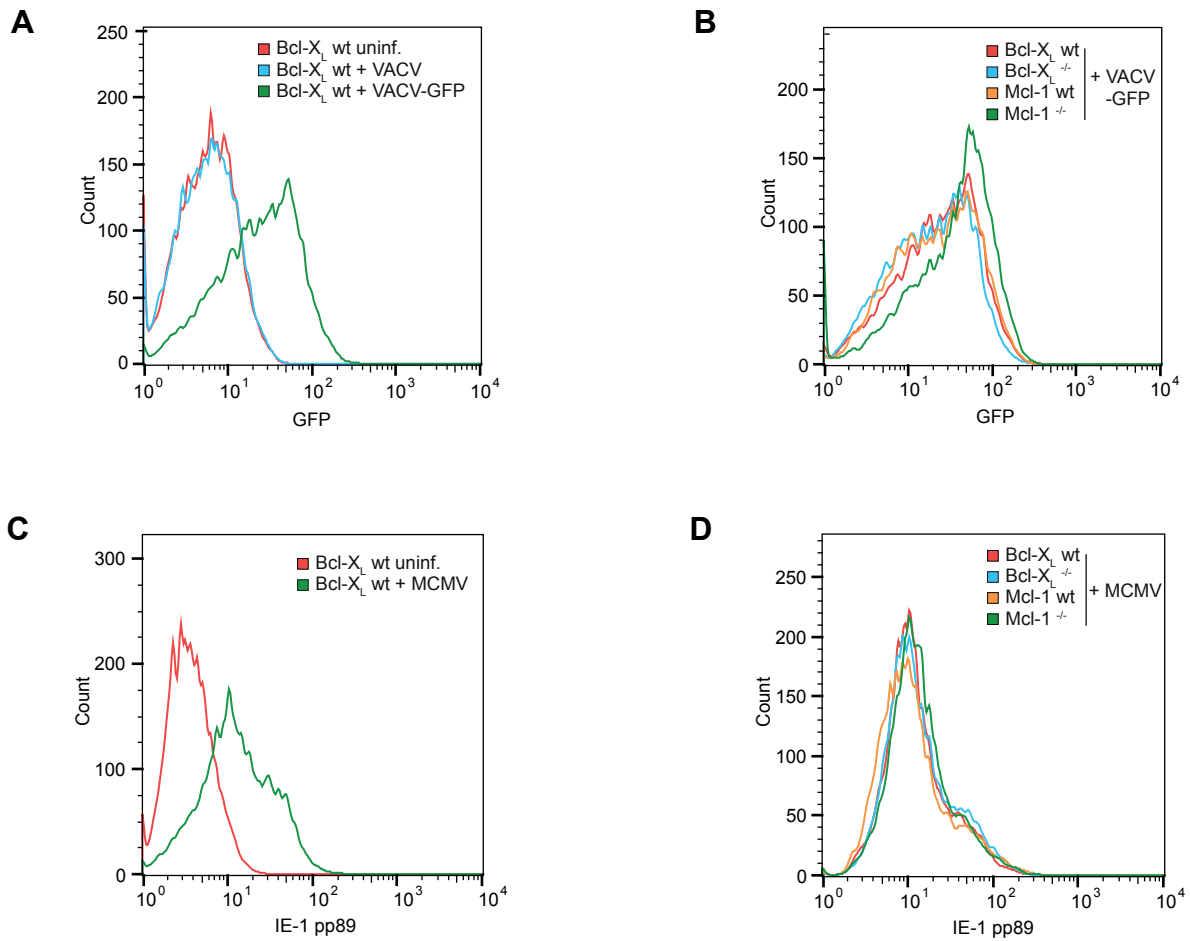

### Figure S6

The efficiency of VACV or MCMV infection is comparable in all genotypes in macrophages. On day 7 of differentiation macrophages wt or Bcl- $X_L$   $^{-/-}$  or Mcl-1  $^{-/-}$  were infected with VACV (**A**) or VACV-GFP (MOI = 10) for 5 h (**A**, **B**) or MCMV (MOI = 10) for 10 h (**C**, **D**). The infection rate was determined by flow cytometry analysis of the expression of viral GFP (**A**, **B**) or expression of the viral protein IE-1 (pp89) (**C**, **D**). Data are representative of 3 independent experiments.

## Suppl. Fig. S7

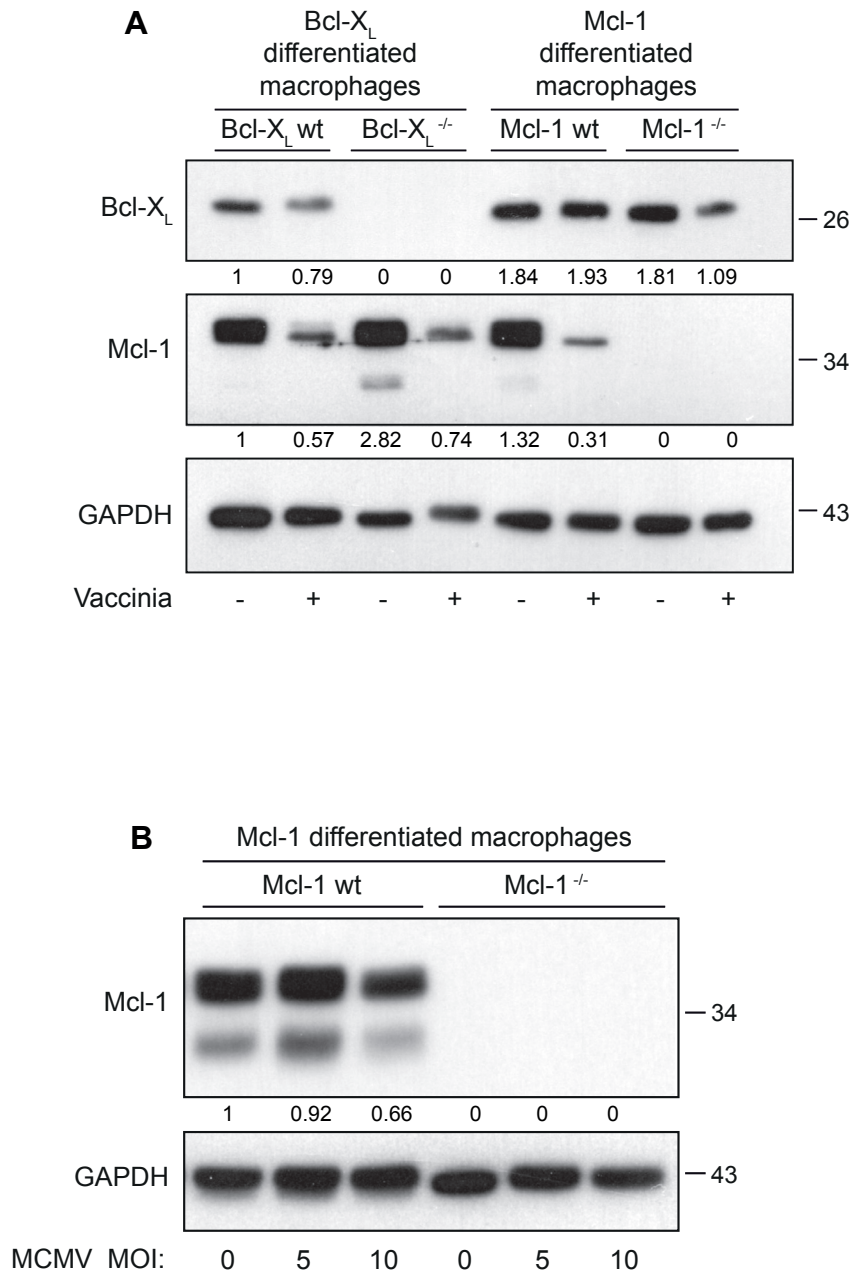

### Figure S7

VACV infection leads to a reduction in Mcl-1 levels whereas infection with MCMV does not. **(A)** Macrophages were infected with VACV (MOI = 10) for 16 h. Protein levels were assessed by Western blotting. Signals were quantified by densitometry and changes in Bcl-X<sub>L</sub>/GAPDH and Mcl-1/GAPDH ratios normalized to uninfected wt control are shown below the blots. Data are representative of at least 3 independent experiments.

**(B)** Macrophages were infected with MCMV (MOI = 5 or 10) for 24 h. Protein levels were assessed by Western blotting. Signals were quantified by densitometry and changes in Mcl-1/GAPDH ratio normalized to uninfected wt control are shown below the blot. Data are representative of at least 3 independent experiments.
